# Supplementary material for: Crisis on the game board – a novel approach to teach medical students about disaster medicine
Source: PubMed Central journal article supplement (PMC6278237; doi:10.3205/zma001192), 2018-11-15
Supplement: JME-35-46-s-001.pdf [file JME-35-46-s-001.pdf]

## Evaluation form AFTERSHOCK-workshop

|          |  |
|----------|--|
| Semester |  |
|----------|--|

|                                                               |           |      |                      |     |          |
|---------------------------------------------------------------|-----------|------|----------------------|-----|----------|
| I would describe my prior knowledge on humanitarian aid as... | very high | high | neither high nor low | low | very low |
|                                                               |           |      |                      |     |          |

|                                                                                           |     |    |
|-------------------------------------------------------------------------------------------|-----|----|
| I have previously attended an event organized by the German Medical Students' Association | yes | no |
|                                                                                           |     |    |

|                                                            |                |       |           |          |                   |
|------------------------------------------------------------|----------------|-------|-----------|----------|-------------------|
| The event's content structure was clear and understandable | strongly agree | agree | undecided | disagree | strongly disagree |
|                                                            |                |       |           |          |                   |

|                                                             |                |       |           |          |                   |
|-------------------------------------------------------------|----------------|-------|-----------|----------|-------------------|
| The simulation gave me an understanding of humanitarian aid | strongly agree | agree | undecided | disagree | strongly disagree |
|                                                             |                |       |           |          |                   |

|                                                           |                |       |           |          |                   |
|-----------------------------------------------------------|----------------|-------|-----------|----------|-------------------|
| The debriefing helped me to better understand the context | strongly agree | agree | undecided | disagree | strongly disagree |
|                                                           |                |       |           |          |                   |

|                                             |             |         |             |          |              |
|---------------------------------------------|-------------|---------|-------------|----------|--------------|
| The level of difficulty of the event was... | way too low | too low | appropriate | too high | way too high |
|                                             |             |         |             |          |              |

|                                       |                |       |           |          |                   |
|---------------------------------------|----------------|-------|-----------|----------|-------------------|
| Overall I am satisfied with the event | strongly agree | agree | undecided | disagree | strongly disagree |
|                                       |                |       |           |          |                   |

|                                                |  |
|------------------------------------------------|--|
| Do you have other suggestions for improvement? |  |
|------------------------------------------------|--|
